# Supplementary material for: Enzymatic Strategy for the Resolution of New 1‐Hydroxymethyl Tetrahydro‐β‐carboline Derivatives in Batch and Continuous‐Flow Systems
Source: PubMed Central journal article supplement — ChemistryOpen. 2016 Mar 1;5(3):254–60. doi: 10.1002/open.201500203 (PMC4984410; doi:10.1002/open.201500203), 2016-03-01
Supplement: OPEN-5-254-s001.pdf [file OPEN-5-254-s001.pdf]

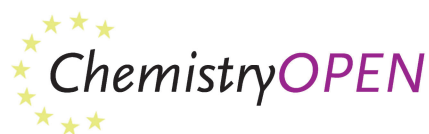

## Supporting Information

© 2016 The Authors. Published by Wiley-VCH Verlag GmbH & Co. KGaA, Weinheim

### **Enzymatic Strategy for the Resolution of New 1-Hydroxymethyl Tetrahydro- $\beta$ -carboline Derivatives in Batch and Continuous-Flow Systems**

Rita Megyesi,<sup>[a]</sup> Enikő Forró,<sup>\*[a]</sup> and Ferenc Fülöp<sup>\*[a, b]</sup>

open\_201500203\_sm\_miscellaneous\_information.pdf

HPLC with Chiralpak OD-H column (4.6 mm × 250 mm), eluent: *n*-hexane: *i*PA (93:7), flow rate: 0.5 mL min<sup>-1</sup>, detection at 260 nm, at room temperature. Retention times (min): for (*R*)-7: 27.7, (*S*)-7: 16.6, (*S*)-10: 13.8 and (*R*)-10: 18.8.

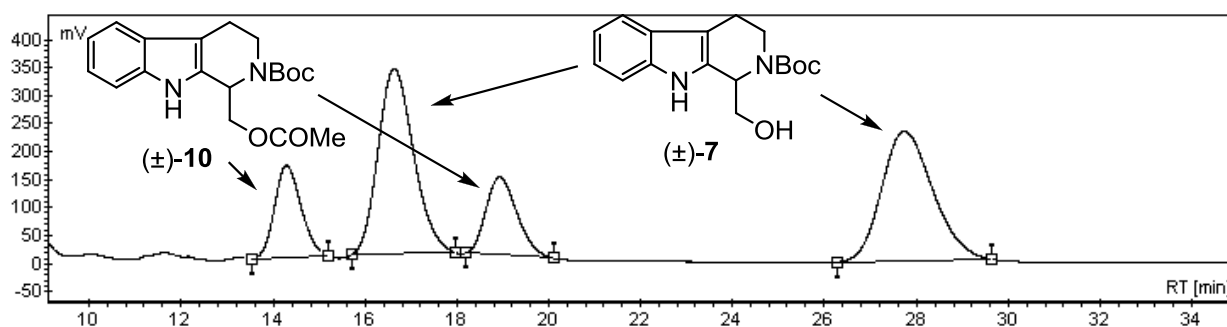

**Figure S1** HPLC chromatogram of (±)-7 and (±)-10

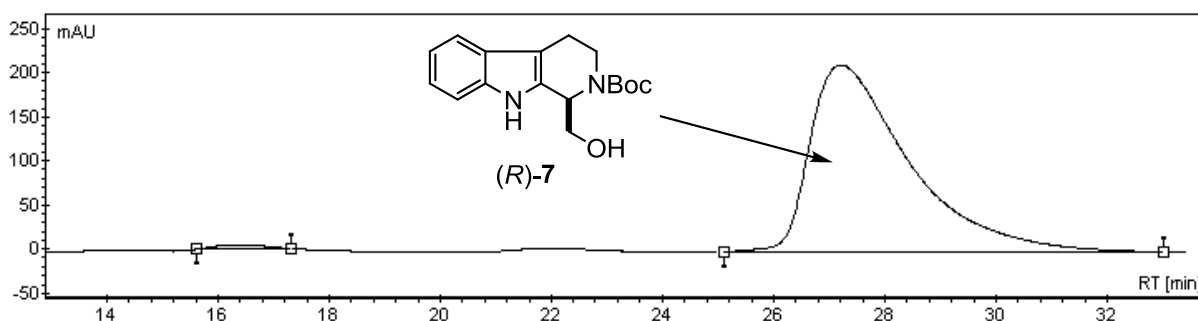

**Figure S2** HPLC chromatogram of the (*R*)-7 (*ee* = 98%) after a column chromatography separation of the preparative-scale enzymatic resolution of (±)-7.

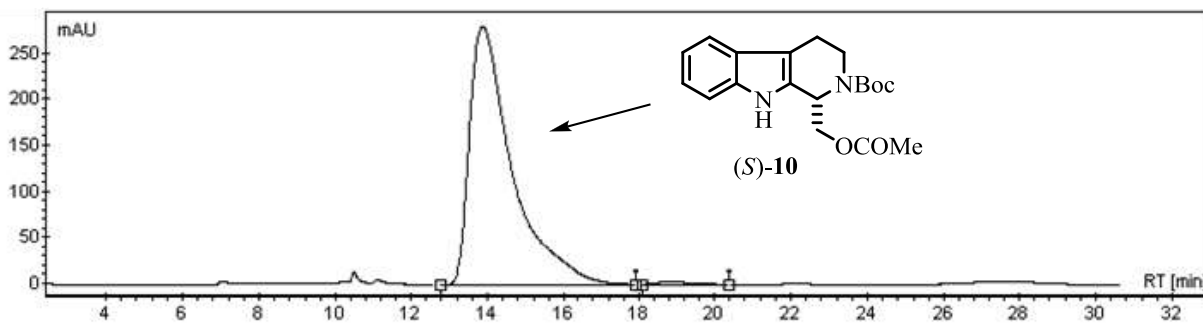

**Figure S3** HPLC chromatogram of the (*S*)-10 (*ee* = 98%) after a column chromatography separation of the preparative-scale enzymatic resolution of (±)-7.

HPLC with Chiralpak OD-H column (4.6 mm × 250 mm), eluent: *n*-hexane: *i*PA (93:7), flow rate: 0.5 mL min<sup>-1</sup>, detection at 260 nm, at room temperature. Retention times (min): for (*S*)-**8**: 21.9, (*R*)-**8**: 38.6, (*S*)-**11**: 17.0 and (*R*)-**11**: 25.3.

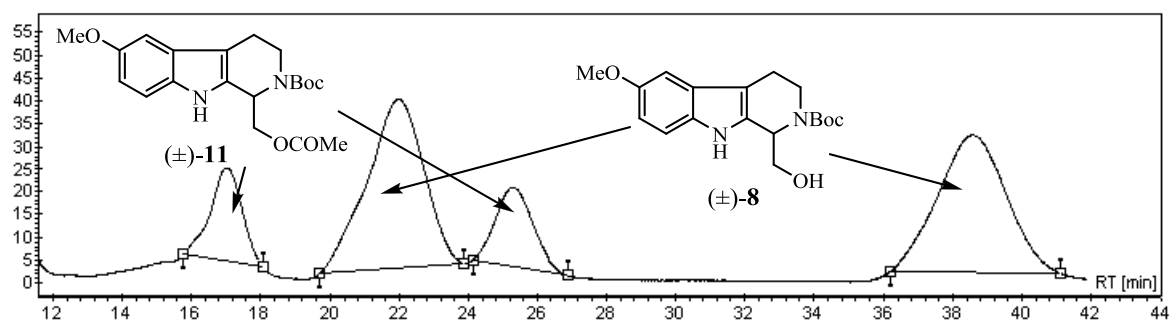

**Figure S4** HPLC chromatogram of (*±*)-**8** and (*±*)-**11**.

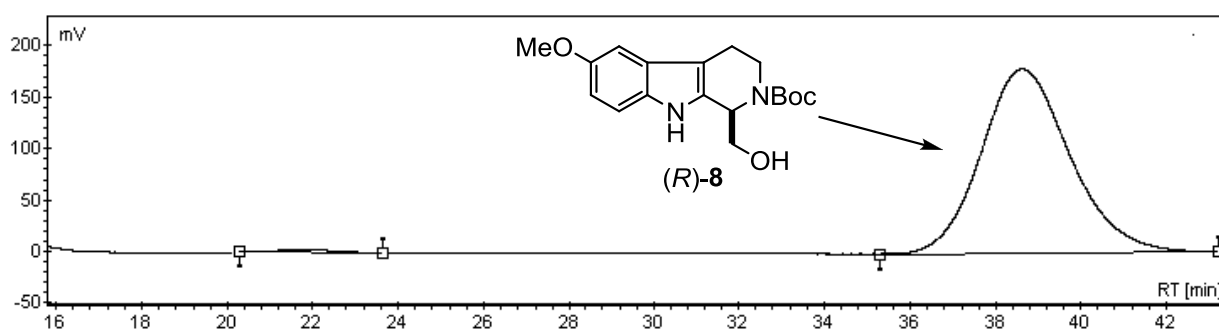

**Figure S5** HPLC chromatogram of the (*R*)-**8** (*ee* = 98%) after a column chromatography separation of the preparative-scale enzymatic resolution of (*±*)-**8**.

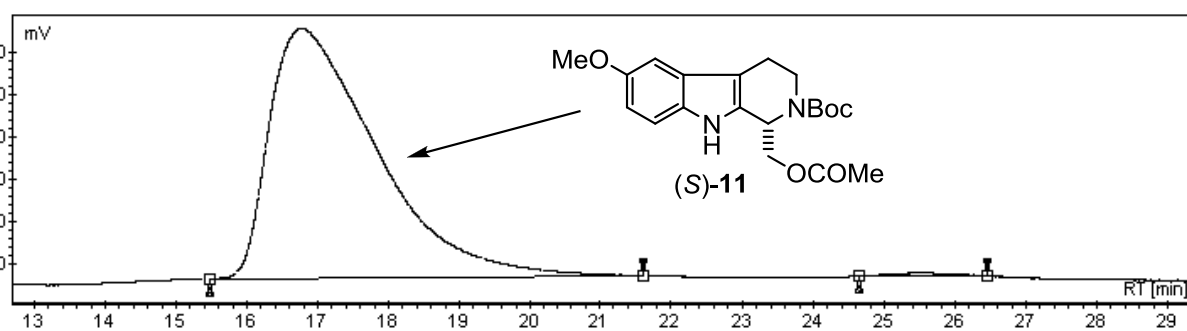

**Figure S6** HPLC chromatogram of the (*S*)-**11** (*ee* = 98%) after a column chromatography separation of the preparative-scale enzymatic resolution of (*±*)-**8**.

HPLC with Chiralpak OD-H column (4.6 mm × 250 mm), eluent: *n*-hexane: *i*PA (93:7), flow rate: 0.5 mL min<sup>-1</sup>, detection at 260 nm, at room temperature. Retention times (min): for (*S*)-**9**: 15.6, (*R*)-**9**: 28.8, (*S*)-**12**: 12.6 and (*R*)-**12**: 19.9.

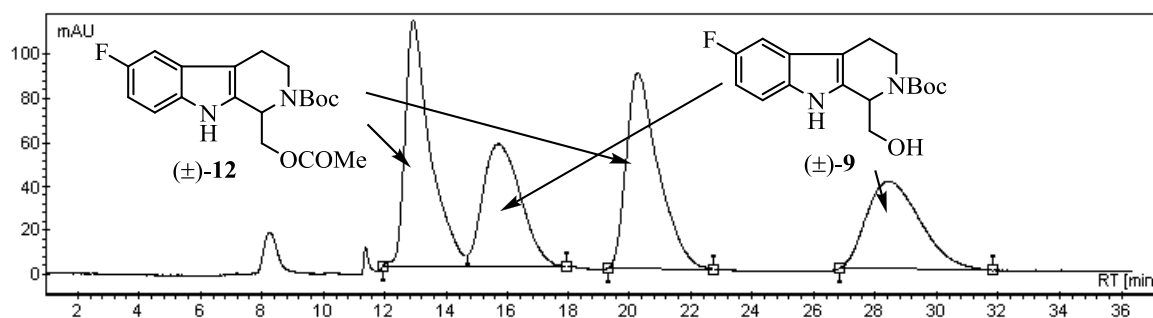

**Figure S7** HPLC chromatogram of (*±*)-**9** and (*±*)-**12**.

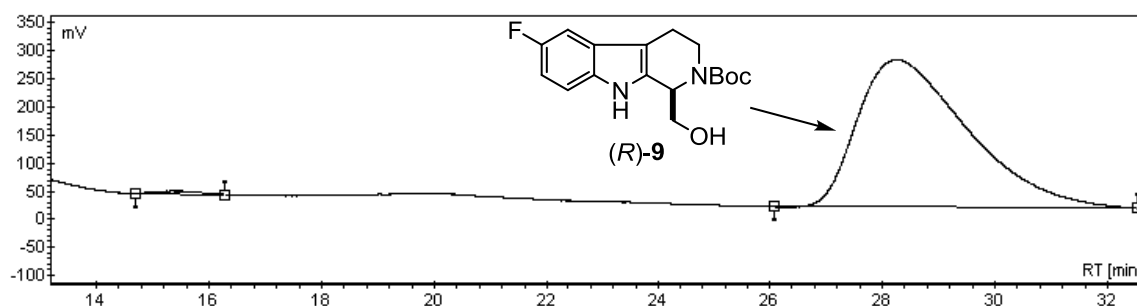

**Figure S8** HPLC chromatogram of the (*R*)-**9** (*ee* = 96%) after a column chromatography separation of the preparative-scale enzymatic resolution of (*±*)-**9**.

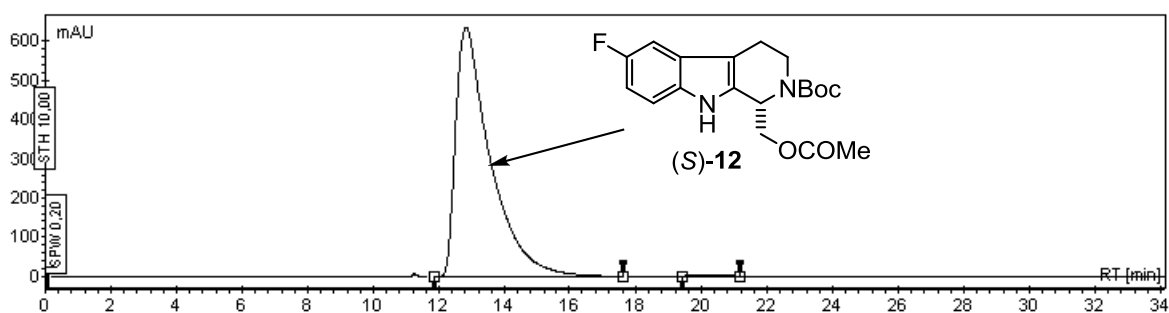

**Figure S9** HPLC chromatogram of the (*S*)-**12** (*ee* = 98%) after a column chromatography separation of the preparative-scale enzymatic resolution of (*±*)-**9**.

HPLC with Chiralpak IA column (4.6 mm × 250 mm), eluent: *n*-hexane: *i*PA (95:5), flow rate: 0.5 mL min<sup>-1</sup>, detection at 210 nm, at room temperature. Retention times (min): for (*S*)-**13**: 88.2, (*R*)-**13**: 92.8.

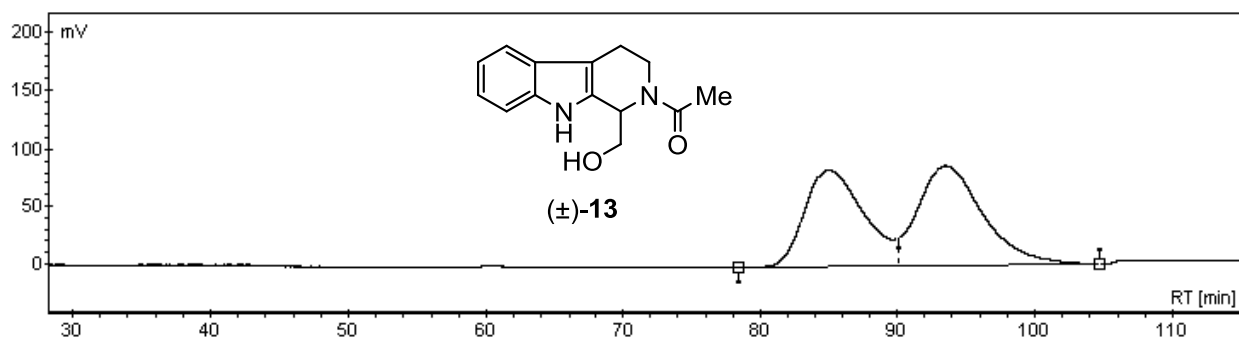

Figure S10 HPLC chromatogram of (±)-**13**.

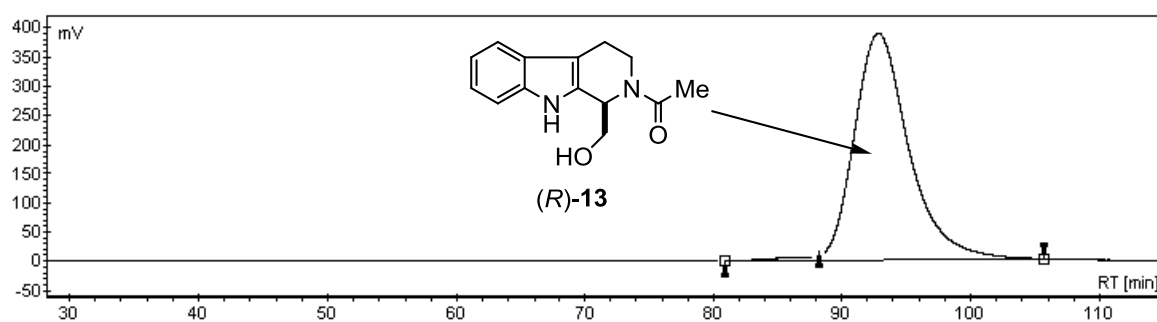

Figure S11 HPLC chromatogram of (*R*)-**13** (*ee* = 98%).

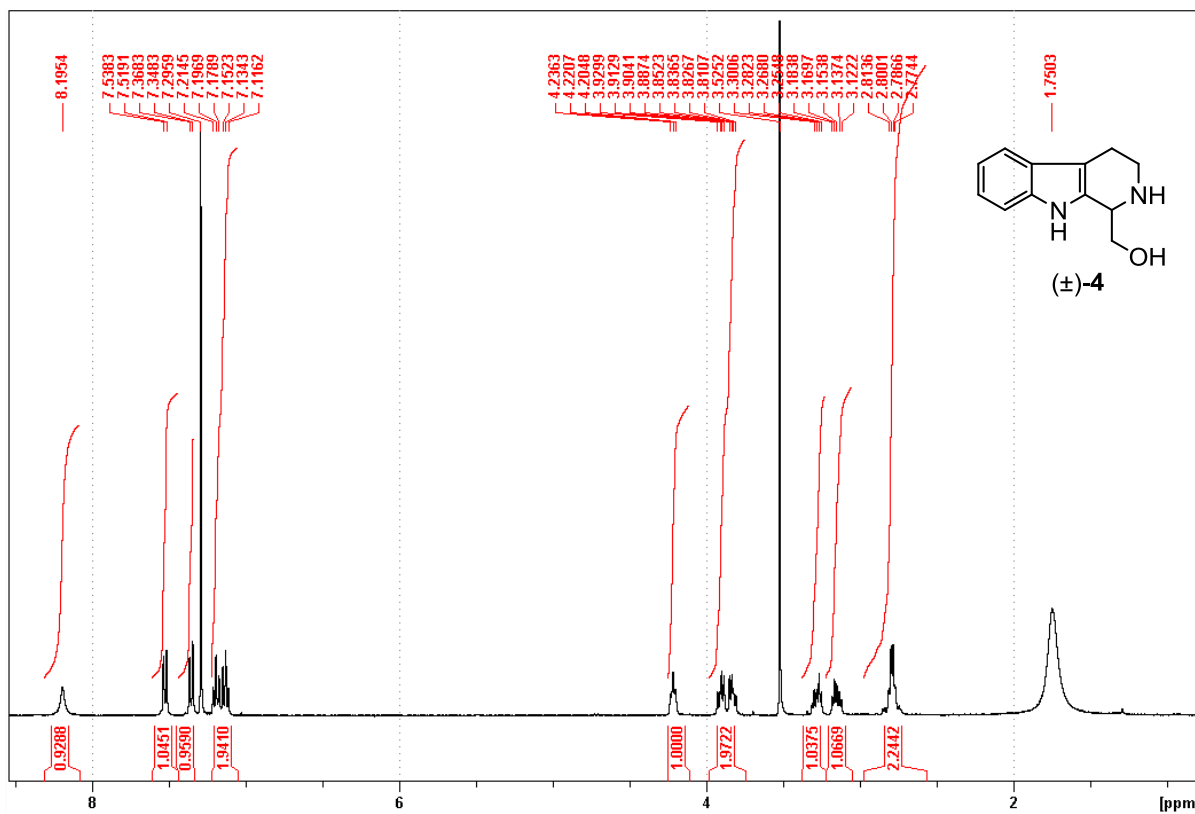

Figure S12:  $^1\text{H}$  NMR (400 MHz,  $\text{CDCl}_3$ , 25  $^\circ\text{C}$ ) spectra for (±)-4.

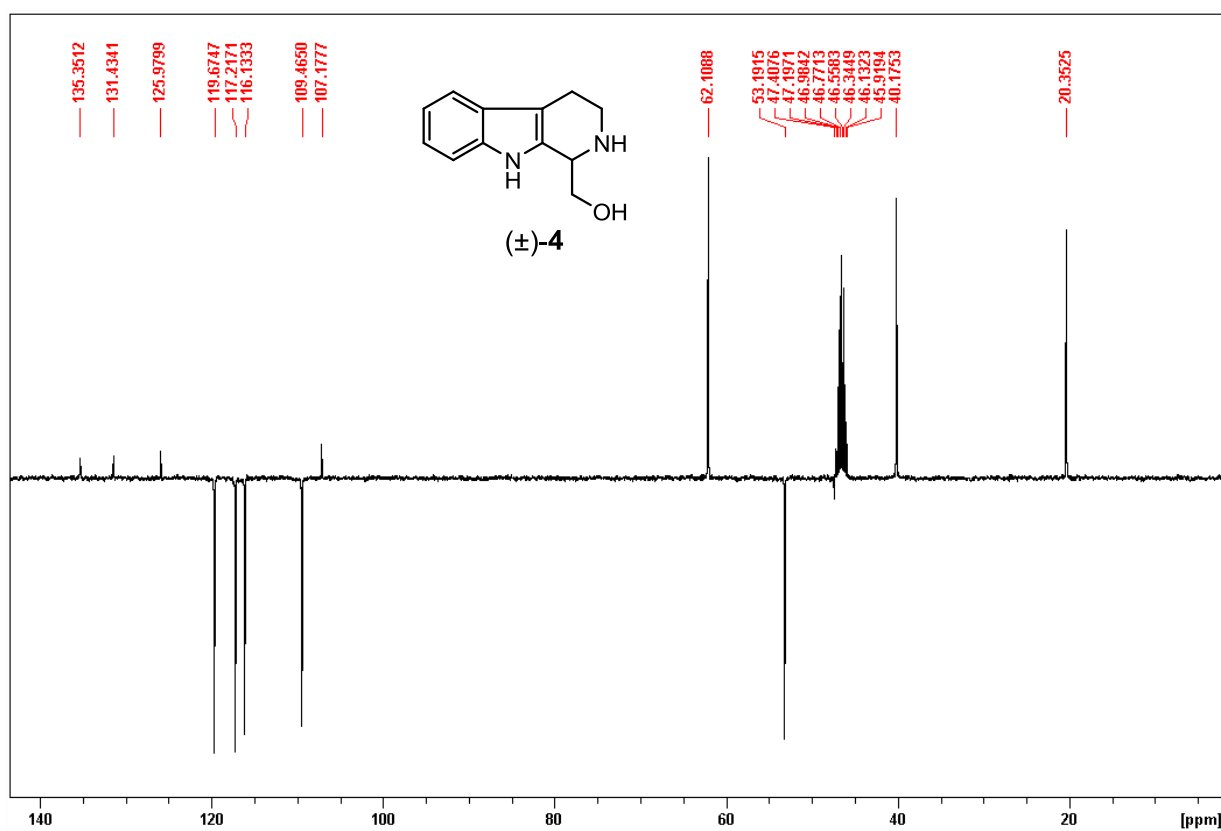

Figure S13:  $^{13}\text{C}$  NMR (400 MHz,  $\text{MeOH-d}_4$ , 25  $^\circ\text{C}$ ) spectra for (±)-4.

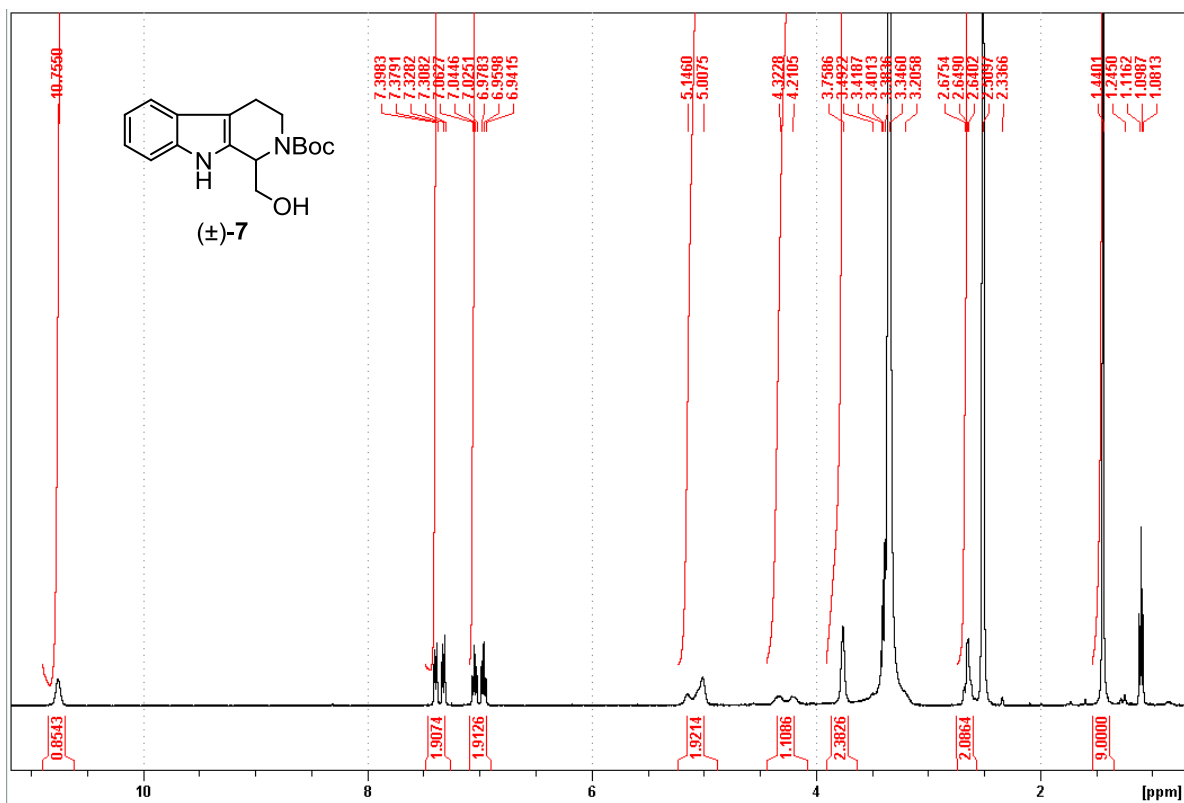

Figure S14:  $^1\text{H}$  NMR (400 MHz, DMSO, 25 °C) spectra for (±)-7.

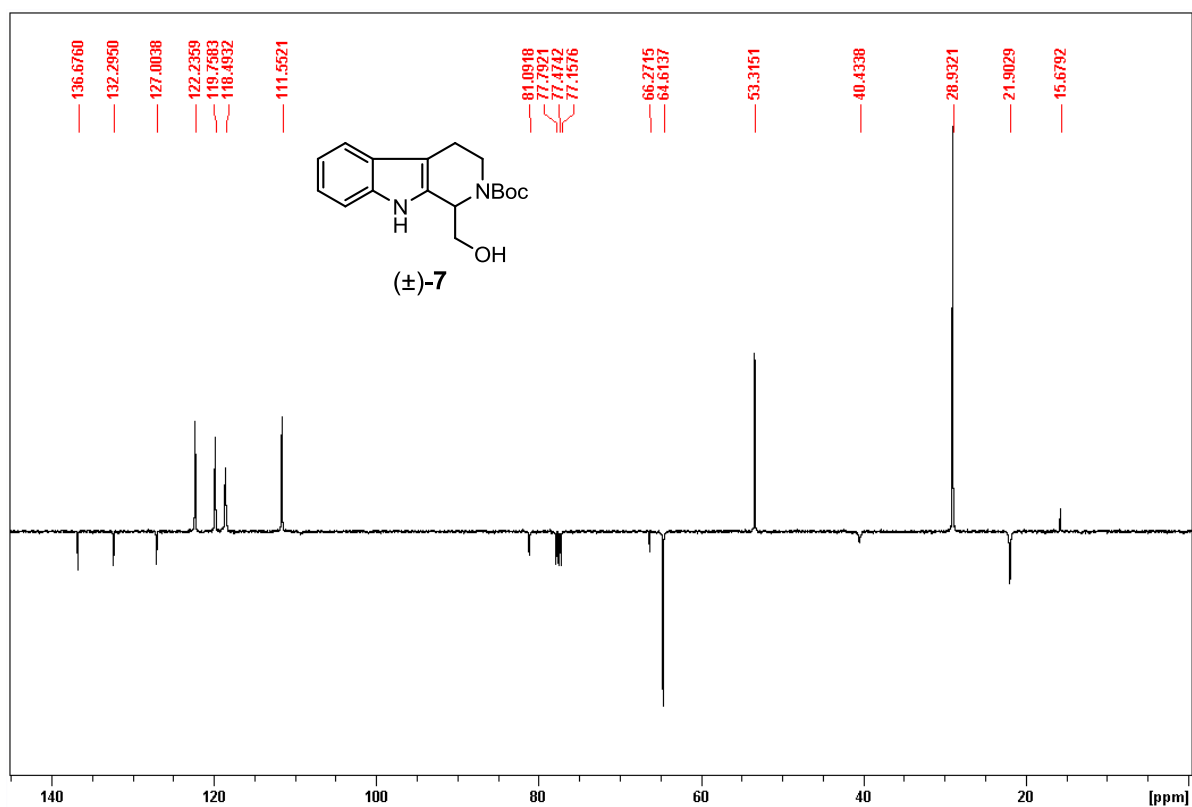

Figure S15:  $^{13}\text{C}$  NMR (400 MHz,  $\text{CDCl}_3$ , 25 °C) spectra for (±)-7.

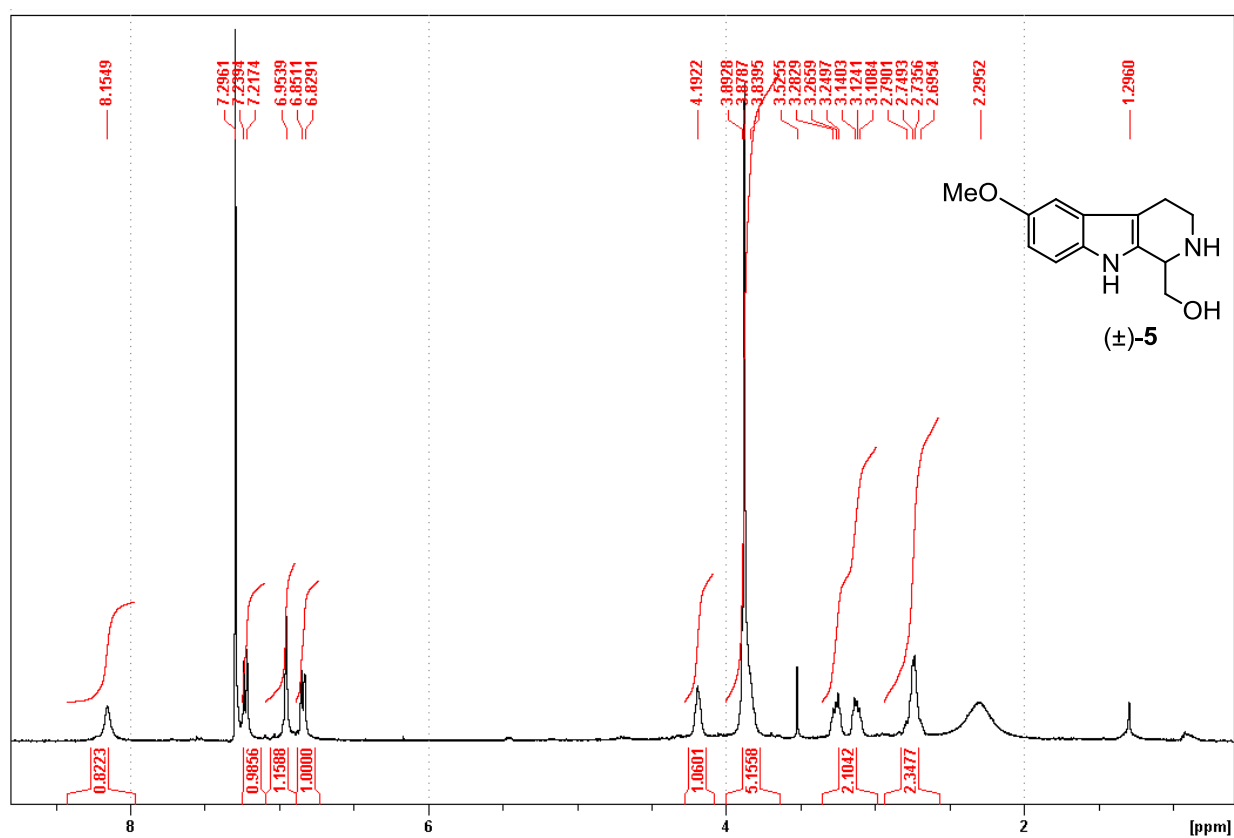

Figure S16:  $^1\text{H}$  NMR (400 MHz,  $\text{CDCl}_3$ , 25 °C) spectra for (±)-5.

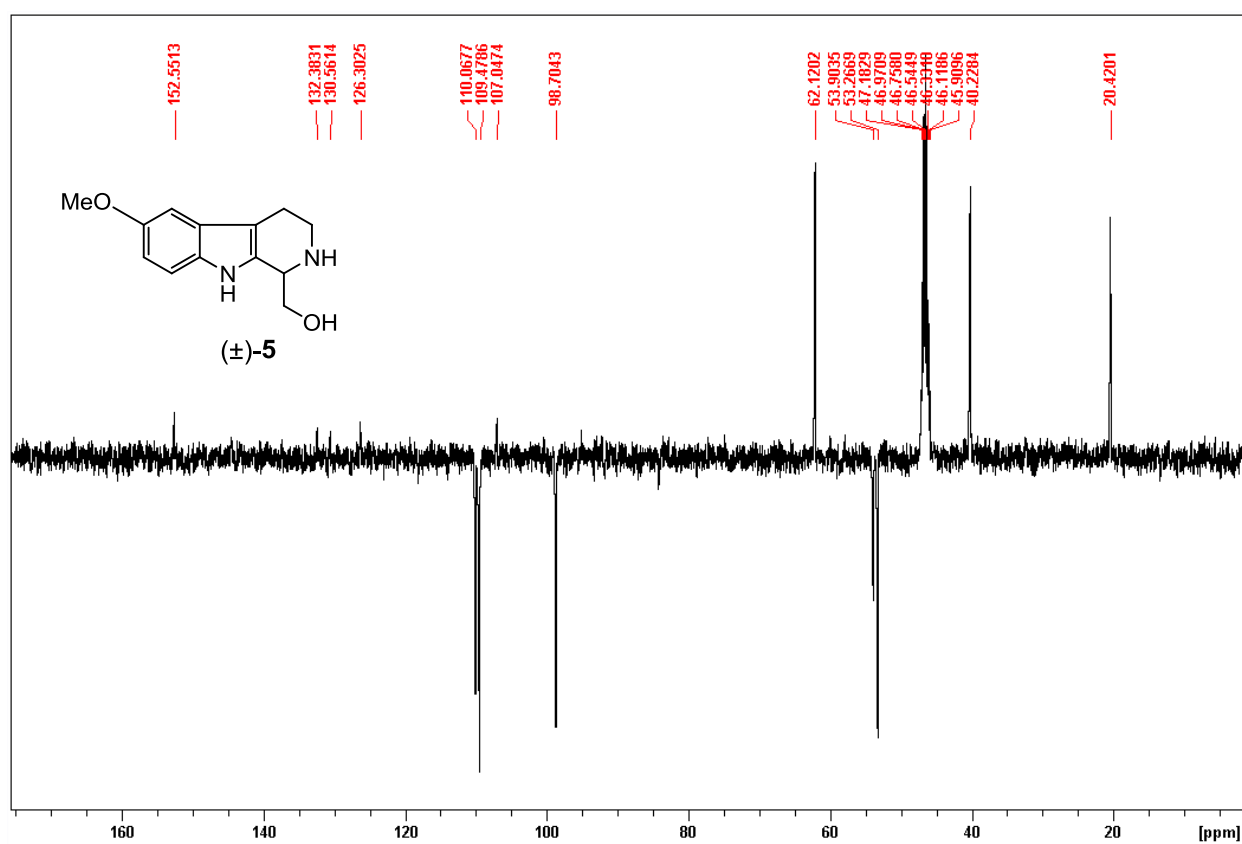

Figure S17:  $^{13}\text{C}$  NMR (400 MHz,  $\text{MeOH-d}_4$ , 25 °C) spectra for (±)-5.



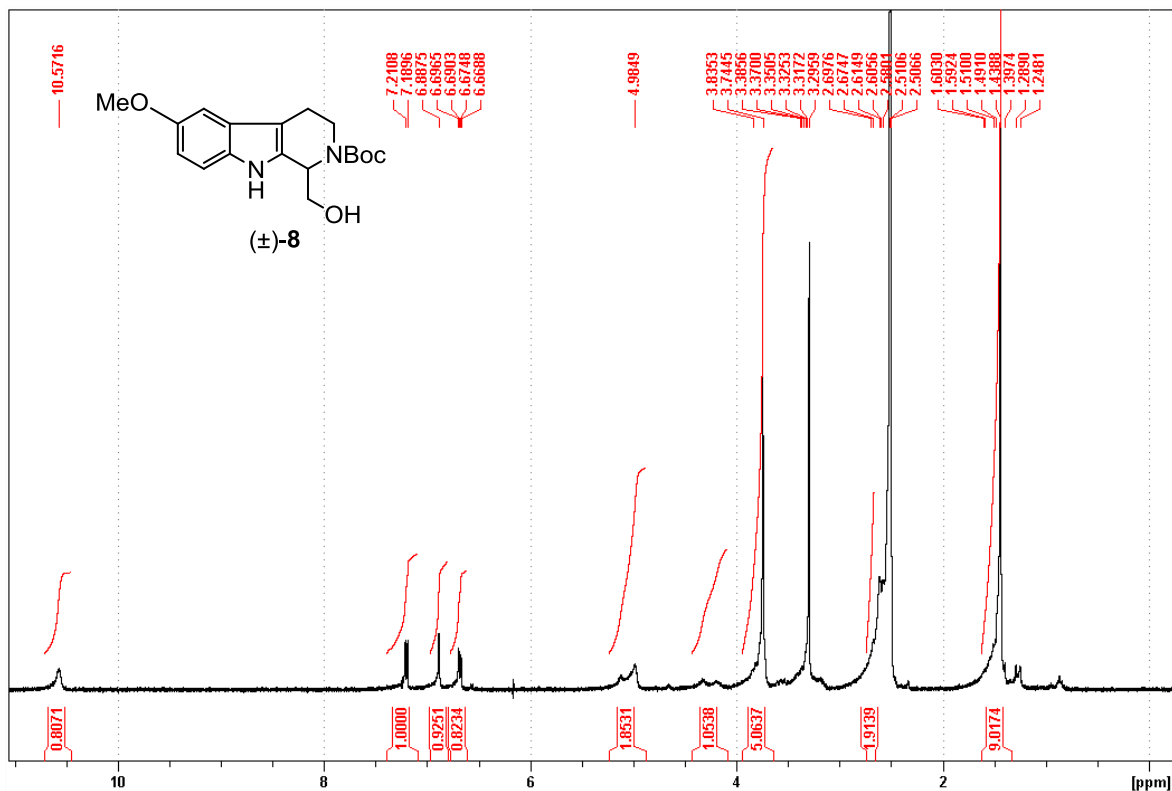

Figure S18: <sup>1</sup>H NMR (400 MHz, DMSO, 25 °C) spectra for (±)-8.

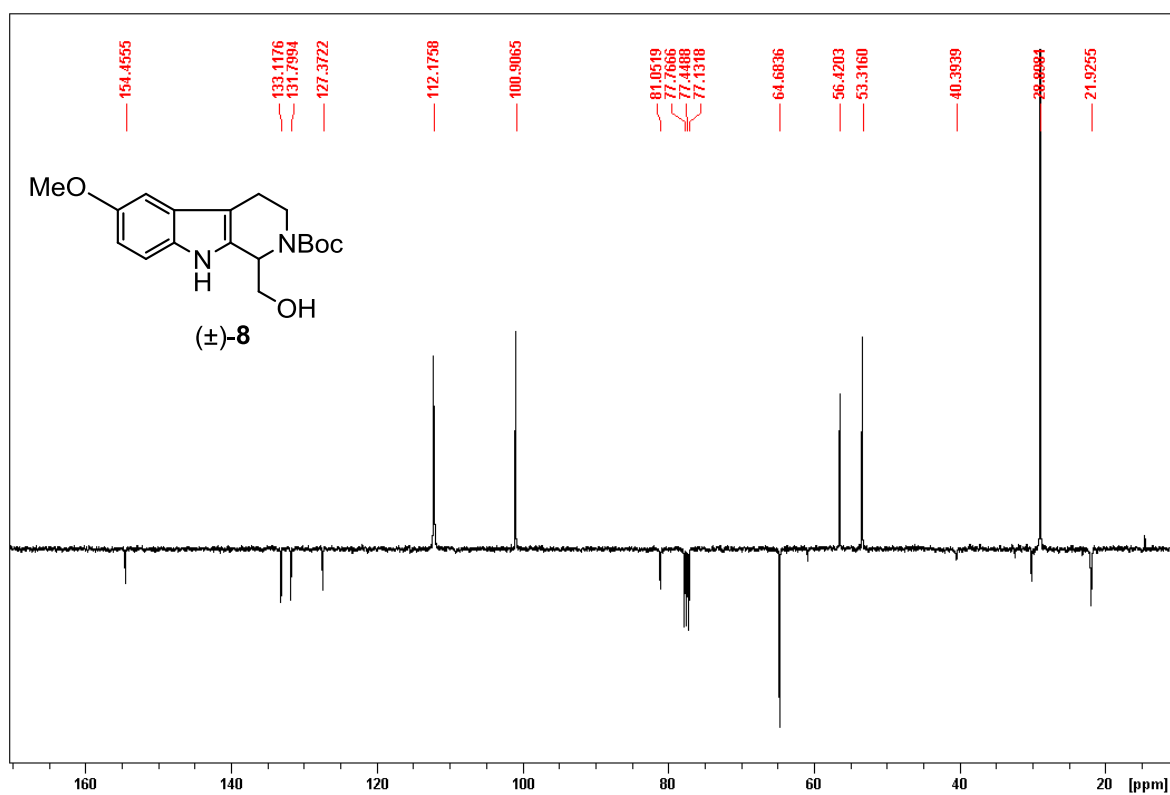

Figure S19: <sup>13</sup>C NMR (400 MHz, CDCl<sub>3</sub>, 25 °C) spectra for (±)-8.

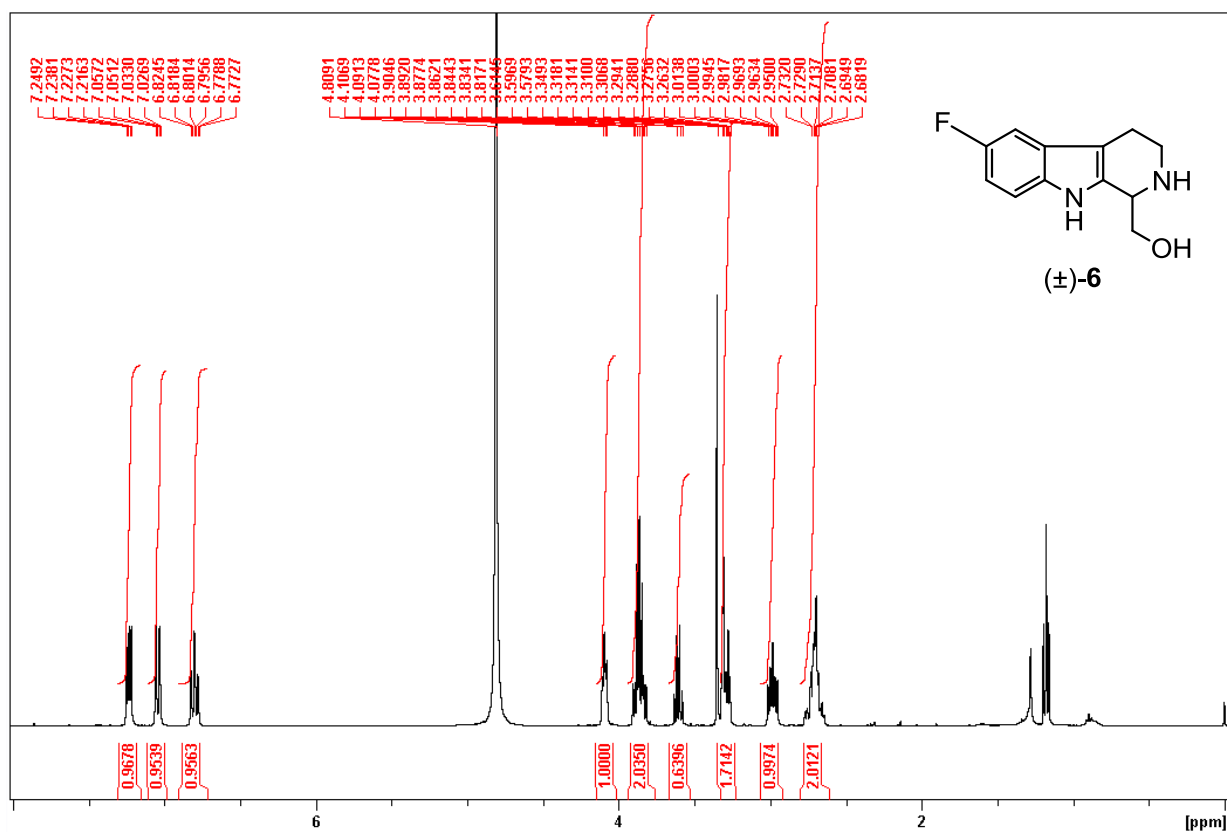

Figure S20:  $^1\text{H}$  NMR (400 MHz, MeOH- $d_4$ , 25 °C) spectra for (±)-6.

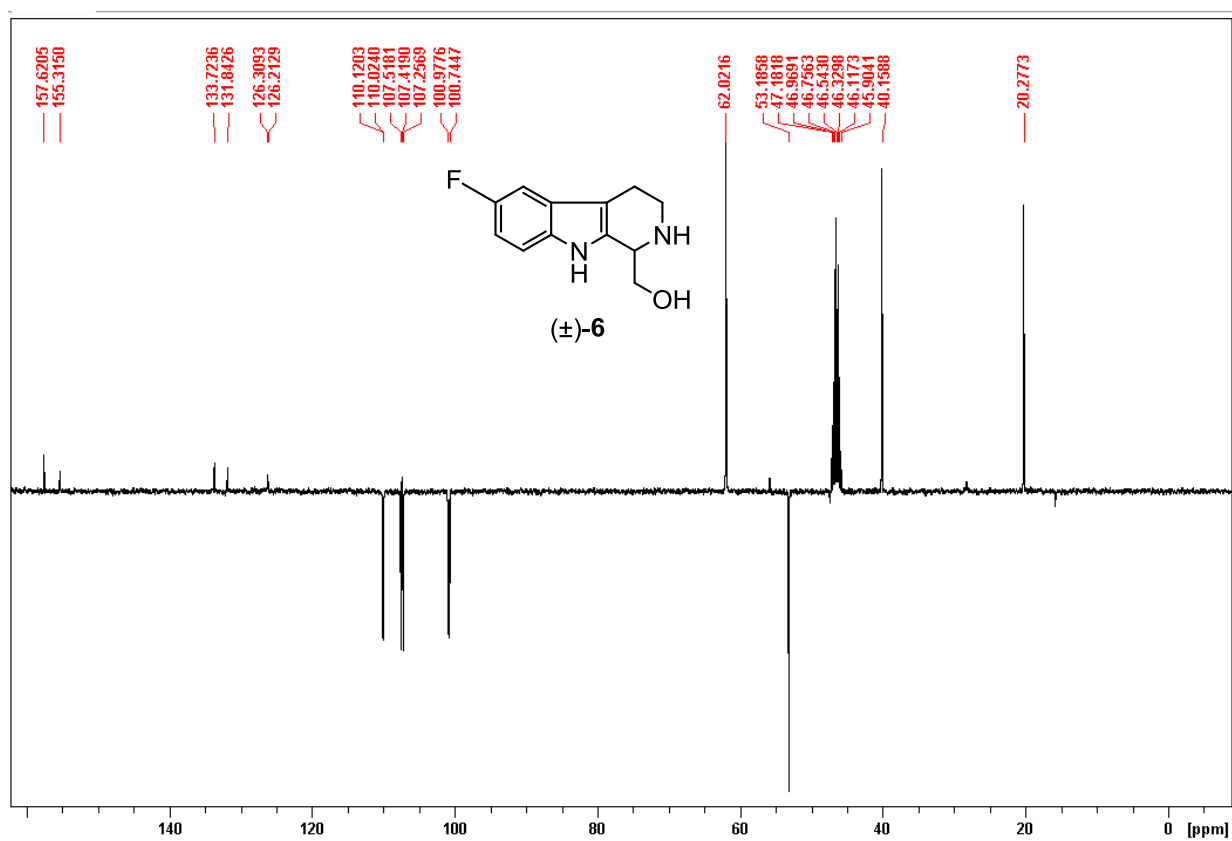

Figure S21:  $^{13}\text{C}$  NMR (400 MHz, MeOH- $d_4$ , 25 °C) spectra for (±)-6.

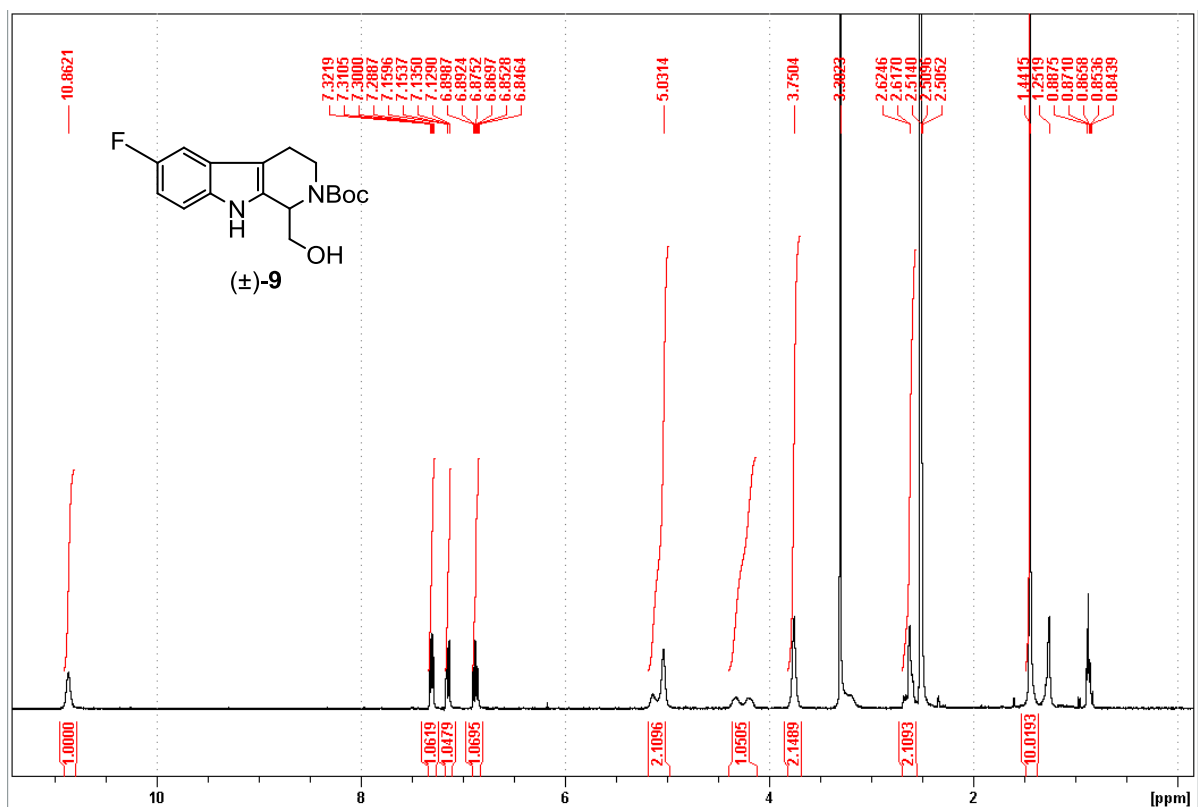

Figure S22: <sup>1</sup>H NMR (400 MHz, DMSO, 25 °C) spectra for (±)-9.

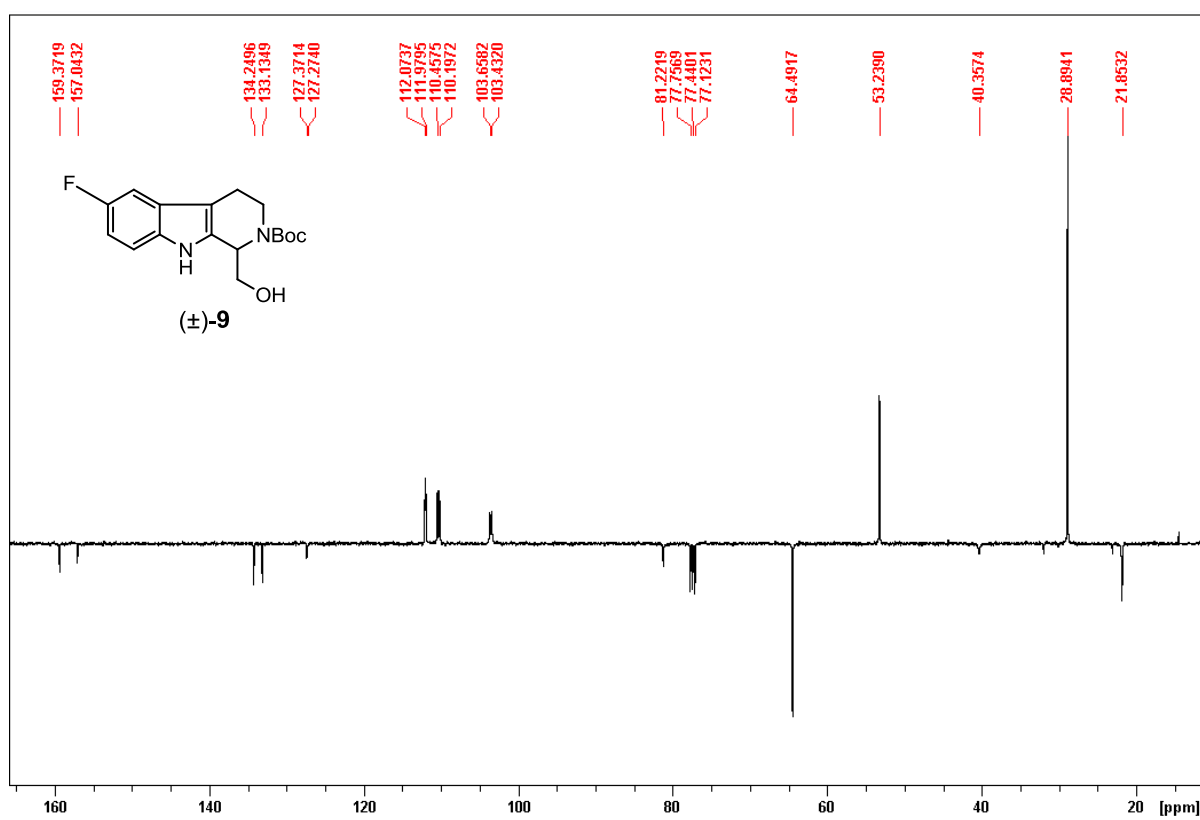

Figure S23: <sup>13</sup>C NMR (400 MHz, CDCl<sub>3</sub>, 25 °C) spectra for (±)-9.

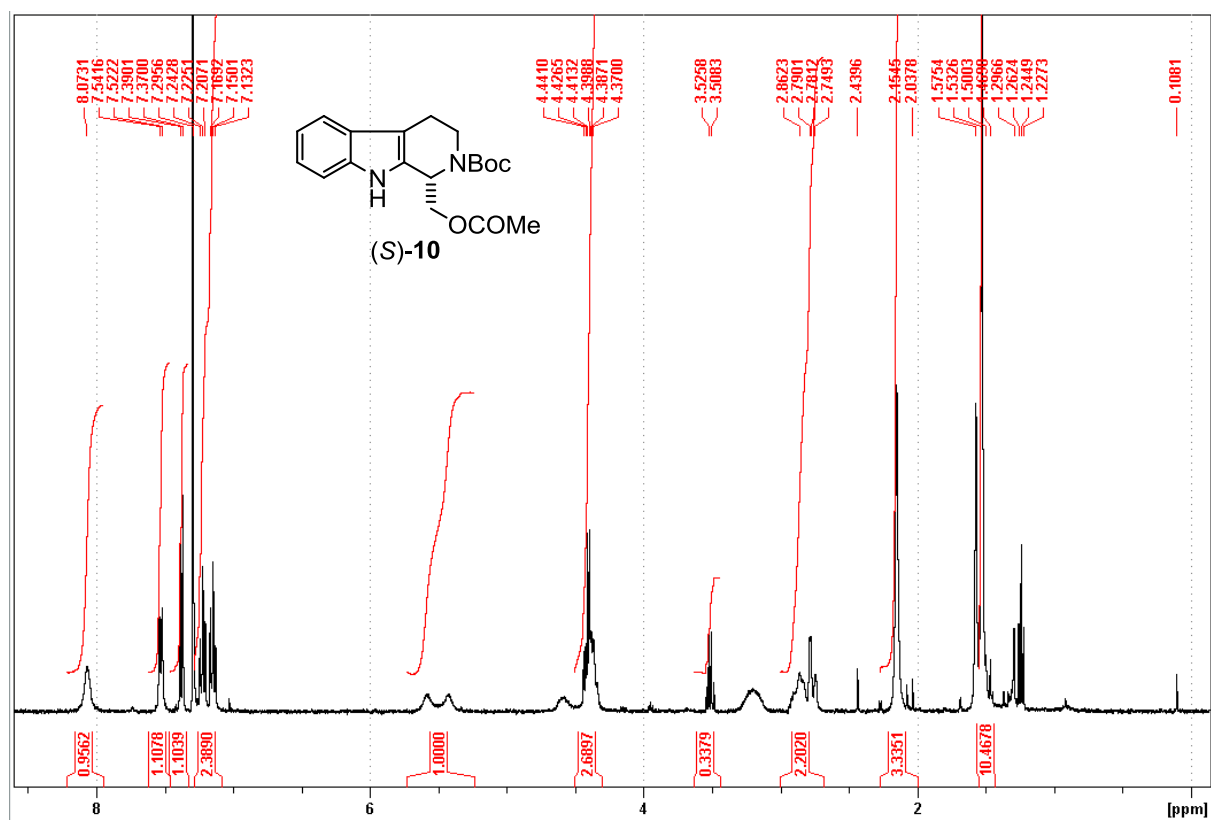

Figure S24:  $^1\text{H}$  NMR (400 MHz,  $\text{CDCl}_3$ , 25  $^\circ\text{C}$ ) spectra for (S)-10.

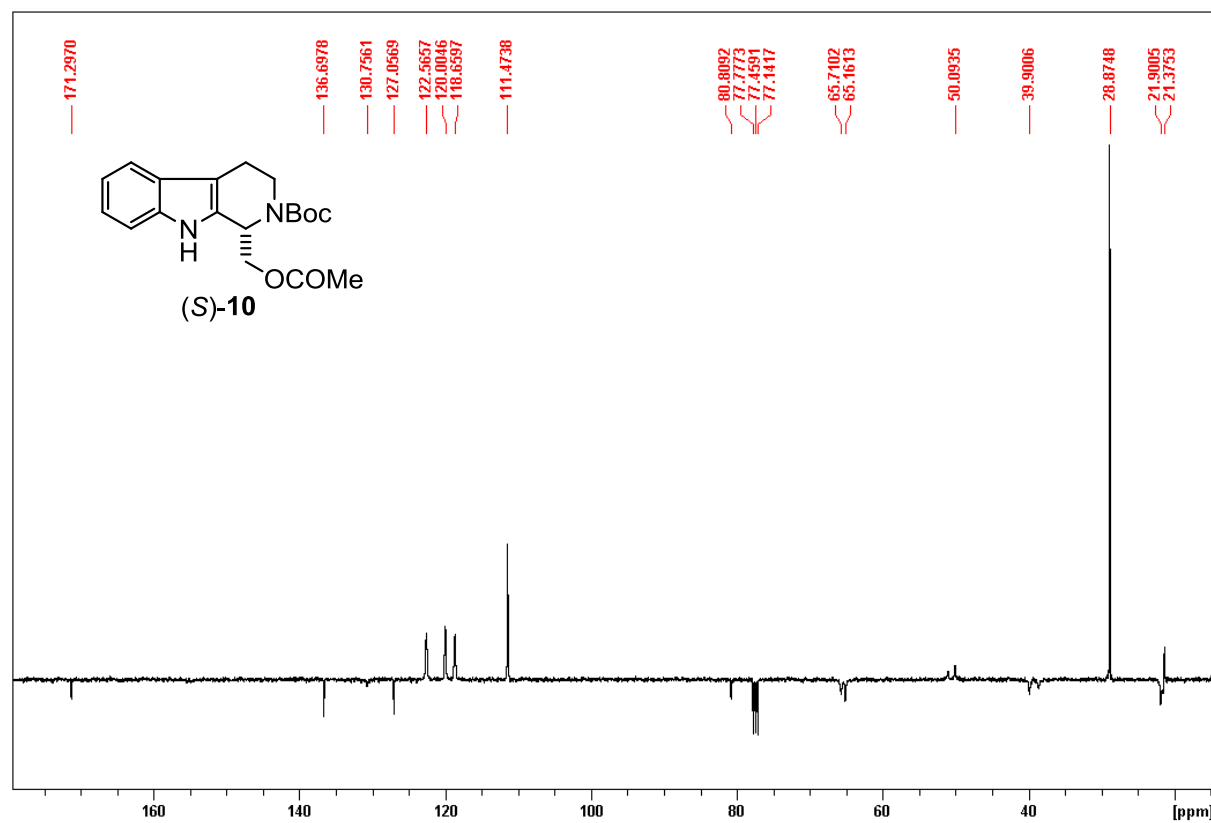

Figure S25:  $^{13}\text{C}$  NMR (400 MHz,  $\text{CDCl}_3$ , 25  $^\circ\text{C}$ ) spectra for (S)-10.

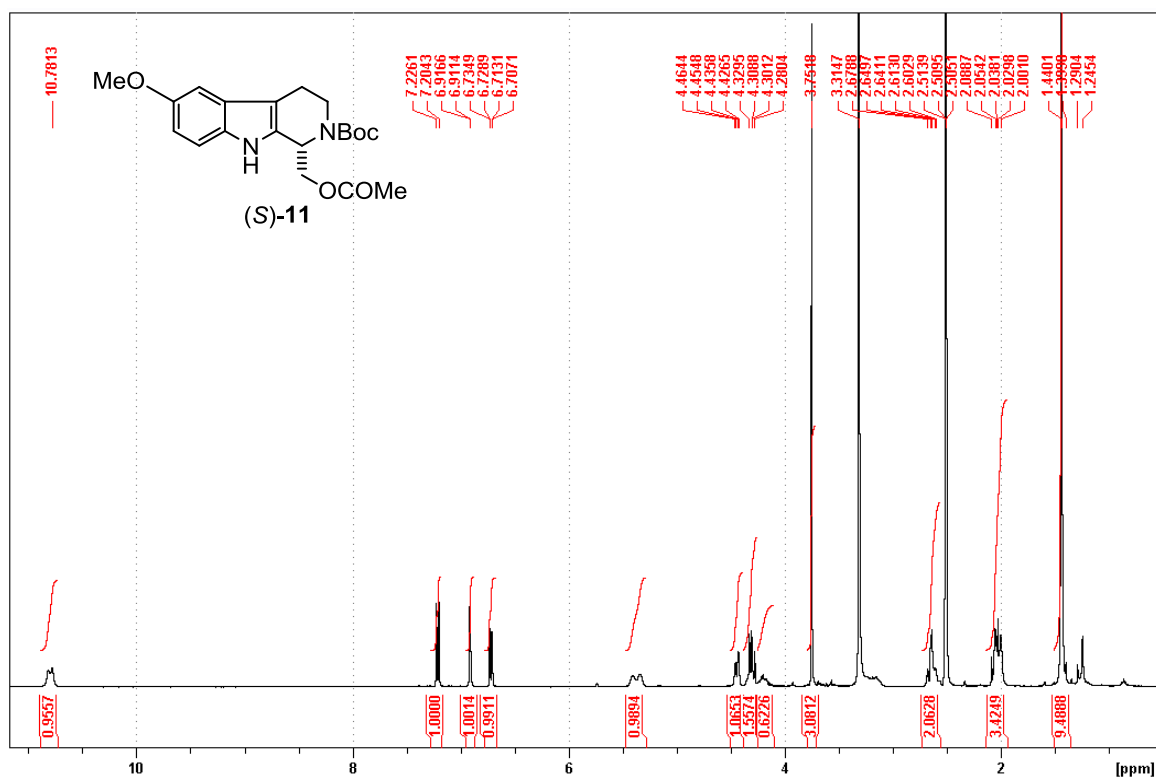

Figure S26: <sup>1</sup>H NMR (400 MHz, DMSO, 25 °C) spectra for (S)-11.

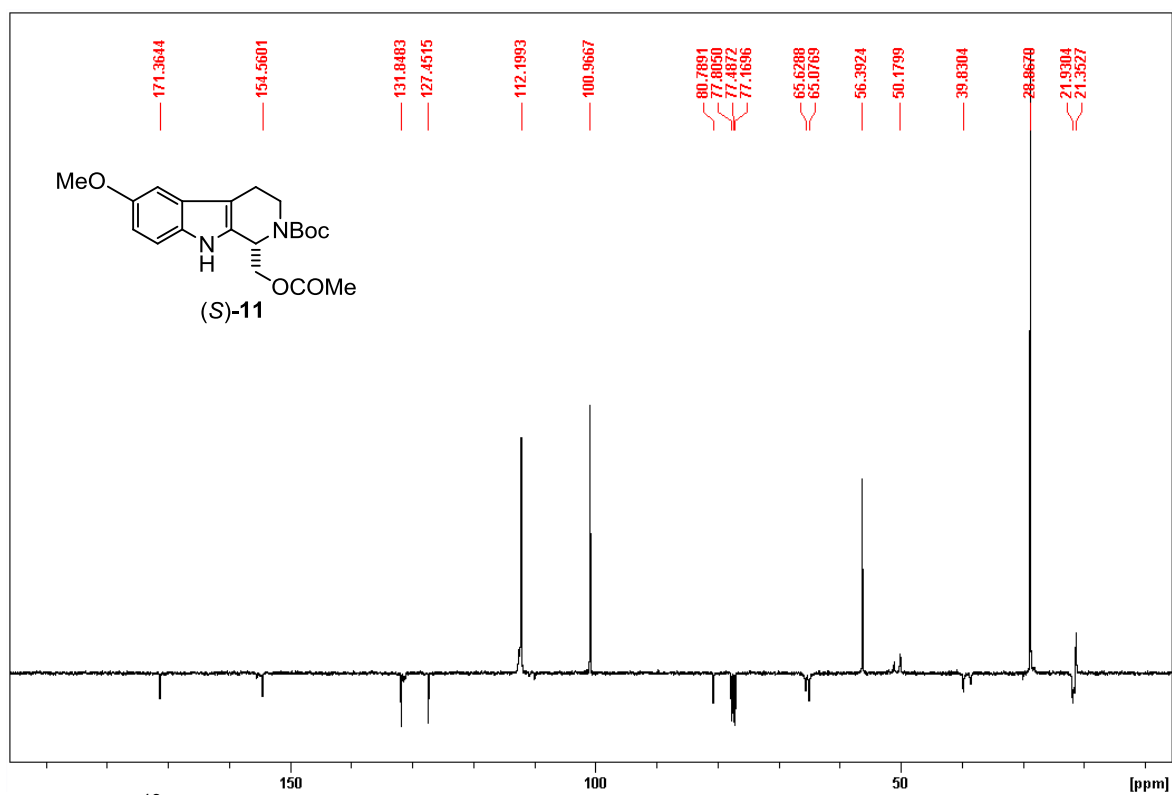

Figure S27: <sup>13</sup>C NMR (400 MHz, CDCl<sub>3</sub>, 25 °C) spectra for (S)-11.

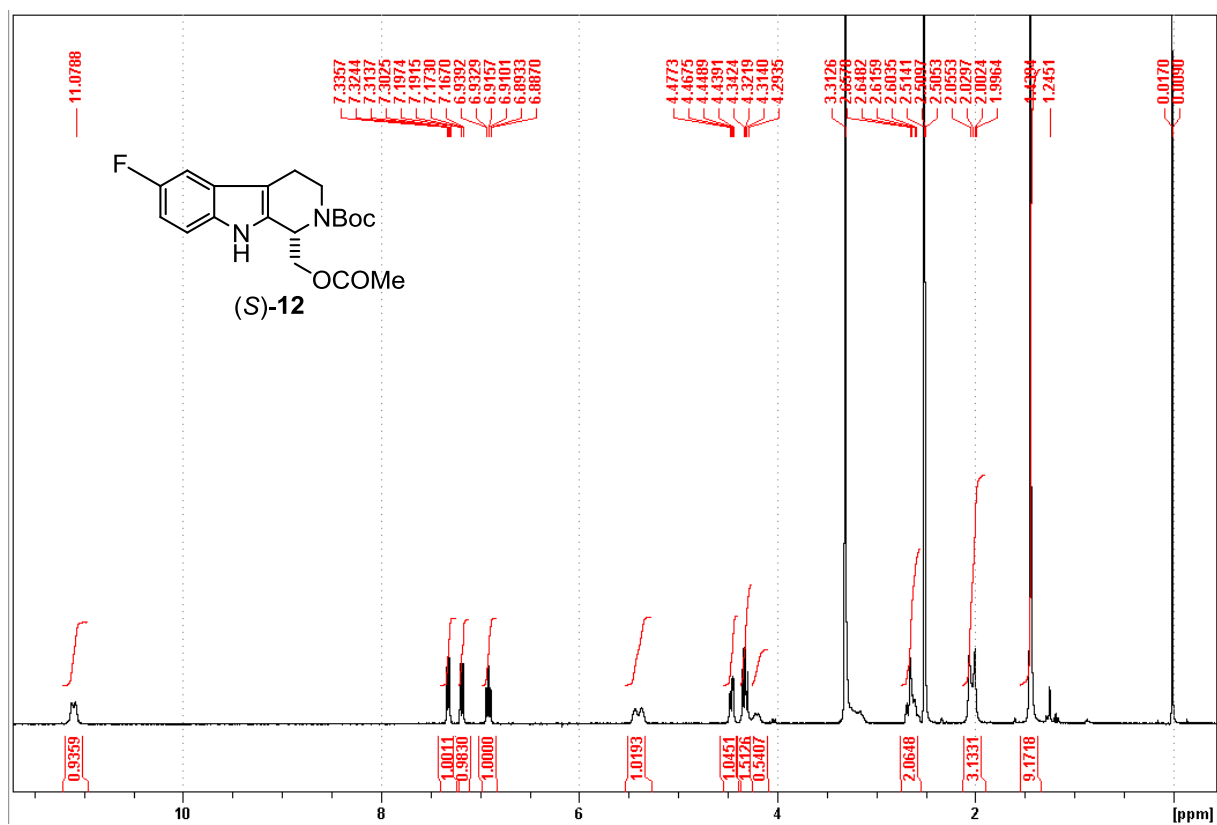

Figure S28: <sup>1</sup>H NMR (400 MHz, DMSO, 25 °C) spectra for (S)-12.

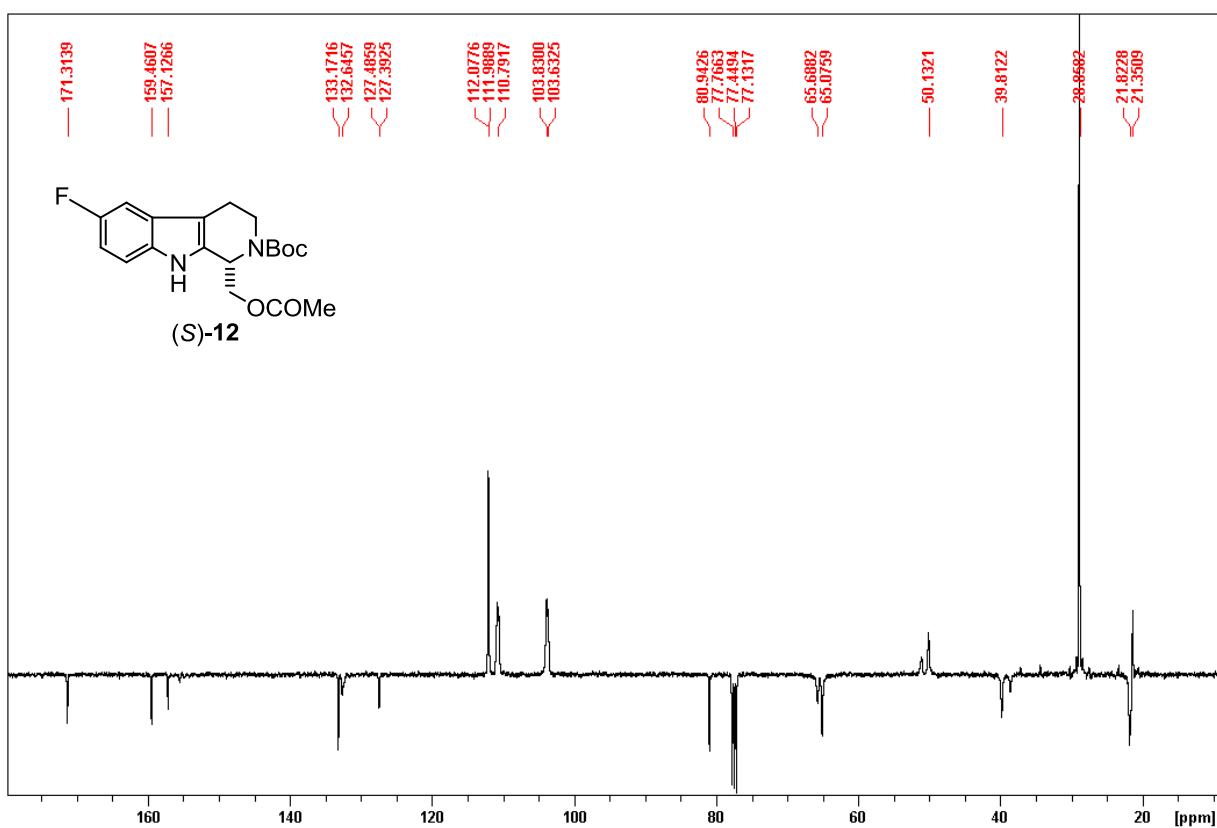

Figure S29: <sup>13</sup>C NMR (400 MHz, CDCl<sub>3</sub>, 25 °C) spectra for (S)-12.

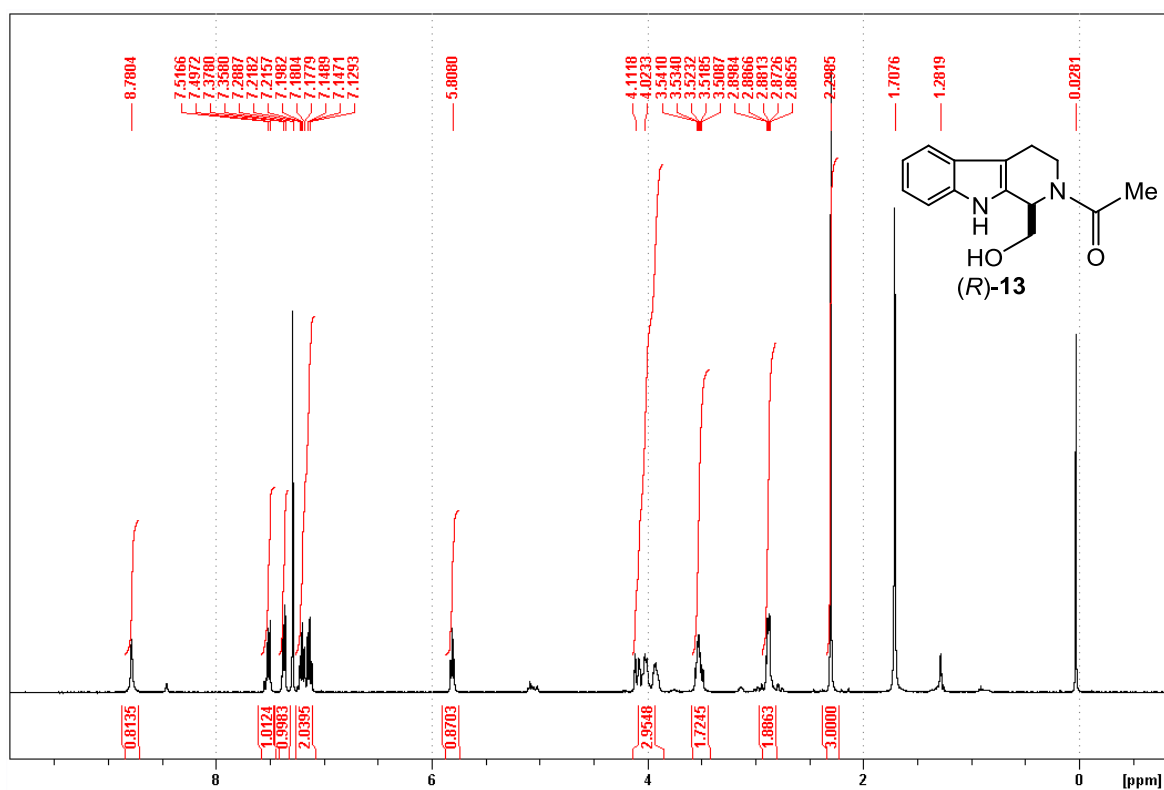

Figure S30:  $^1\text{H}$  NMR (400 MHz,  $\text{CDCl}_3$ , 25  $^\circ\text{C}$ ) spectra for (R)-13.
